# Supplementary material for: Impact of Inadequate Calorie Intake on Mortality and Hospitalization in Stable Patients with Chronic Heart Failure
Source: PubMed Central journal article supplement (PMC7998469; doi:10.3390/nu13030874), 2021-03-08
Supplement: nutrients-13-00874-s001.pdf [file nutrients-13-00874-s001.pdf]

**Supplementary Table S1.** Daily intakes of foods and beverages estimated using a BDHQ

|                                   | Adequate calorie intake<br>(n=101) | Inadequate calorie intake<br>(n=44) | p-value |
|-----------------------------------|------------------------------------|-------------------------------------|---------|
| Low fat milk, g                   | 0 (0–68)                           | 0 (0–17)                            | 0.18    |
| Whole milk, g                     | 59 (0–156)                         | 11 (0–56)                           | 0.04    |
| Chicken, g                        | 16 (7–36)                          | 11 (5–27)                           | <0.01   |
| Pork/beef, g                      | 28 (13–36)                         | 12 (6–28)                           | <0.01   |
| Ham/sausage/bacon, g              | 5 (2–12)                           | 2 (0–4)                             | <0.01   |
| Squid/octopus/shrimp/shellfish, g | 14 (6–30)                          | 6 (6–14)                            | 0.02    |
| Small fish with bones, g          | 6 (0–22)                           | 0 (0–5)                             | <0.01   |
| Canned tuna, g                    | 0 (0–4)                            | 0 (0–3)                             | 0.08    |
| Dried fish/salted fish, g         | 26 (12–33)                         | 11 (5–26)                           | <0.01   |
| Oily fish, g                      | 15 (7–34)                          | 7 (6–17)                            | <0.01   |
| Lean fish, g                      | 26 (12–41)                         | 12 (6–15)                           | <0.01   |
| Egg, g                            | 30 (21–60)                         | 23 (9–27)                           | <0.01   |
| Tofu, g                           | 40 (18–79)                         | 15 (13–36)                          | <0.01   |
| Natto, g                          | 0 (0–17)                           | 0 (0–7)                             | 0.18    |
| Potatoes, g                       | 46 (18–58)                         | 18 (10–46)                          | <0.01   |
| Pickled green leafy vegetables, g | 0 (0–4)                            | 0 (0–2)                             | 0.25    |
| Other pickled vegetables, g       | 2 (0–12)                           | 1 (0–3)                             | 0.08    |
| Cabbage/Chinese cabbage, g        | 21 (15–48)                         | 17 (6–40)                           | 0.02    |
| Green-leaved vegetables, g        | 30 (13–63)                         | 8 (5–27)                            | <0.01   |
| Carrots/pumpkin, g                | 19 (8–38)                          | 15 (3–17)                           | <0.01   |
| Japanese radish/turnip, g         | 25 (6–45)                          | 10 (4–26)                           | 0.01    |
| Other root vegetables, g          | 34 (22–62)                         | 26 (10–51)                          | 0.03    |
| Tomatoes, g                       | 25 (6–51)                          | 9 (4–23)                            | <0.01   |
| Mushrooms, g                      | 11 (4–18)                          | 4 (2–12)                            | <0.01   |
| Seaweeds, g                       | 10 (4–14)                          | 5 (2–11)                            | <0.01   |
| Western-type confectioneries, g   | 5 (0–27)                           | 5 (0–10)                            | <0.01   |
| Japanese-type confectioneries, g  | 4 (0–8)                            | 0 (0–4)                             | <0.01   |
| Rice crackers, g                  | 7 (3–21)                           | 4 (0–4)                             | <0.01   |
| Ice cream, g                      | 9 (0–20)                           | 8 (0–20)                            | 0.42    |
| Citrus fruits, g                  | 37 (7–74)                          | 10 (0–37)                           | <0.01   |
| Persimmons/strawberries, g        | 7 (0–32)                           | 0 (0–15)                            | 0.03    |
| Other fruits, g                   | 37 (13–74)                         | 14 (0–37)                           | 0.01    |
| Mayonnaise/dressing, g            | 5 (2–10)                           | 2 (1–5)                             | <0.01   |
| Bread, g                          | 32 (12–65)                         | 10 (4–46)                           | <0.01   |
| Buckwheat noodles, g              | 12 (0–24)                          | 10 (2–21)                           | 0.37    |
| Japanese wheat noodles, g         | 16 (7–46)                          | 15 (8–21)                           | 0.39    |

|                                   |               |               |       |
|-----------------------------------|---------------|---------------|-------|
| Chinese noodles, g                | 9 (0–17)      | 9 (0–18)      | 0.90  |
| Spaghetti/macaroni, g             | 9 (0–18)      | 9 (0–11)      | 0.54  |
| Green tea, g                      | 150 (5–433)   | 124 (0–433)   | 0.57  |
| Black tea/oolong tea, g           | 0 (0–54)      | 0 (0–12)      | 0.43  |
| Coffee, g                         | 124 (12–375)  | 23 (0–173)    | 0.02  |
| Coke/soft drink, g                | 13 (0–82)     | 7 (0–33)      | 0.45  |
| 100% fruit and vegetable juice, g | 0 (0–82)      | 0 (0–15)      | 0.06  |
| Rice, g                           | 270 (208–360) | 208 (120–270) | <0.01 |
| Miso soup, g                      | 96 (54–139)   | 69 (55–121)   | 0.23  |

Data are median (1st–3rd quartile). Inadequate calorie intake was defined as <60% of estimated calorie requirement.

**Supplementary Table S2.** Daily intakes of nutrients estimated using a BDHQ

|                      | <b>Adequate calorie intake<br/>(n=101)</b> | <b>Inadequate calorie intake<br/>(n=44)</b> | <b>p-value</b> |
|----------------------|--------------------------------------------|---------------------------------------------|----------------|
| Total protein, g     | 74 (61–93)                                 | 43 (32–53)                                  | <0.01          |
| Animal protein, g    | 43 (33–60)                                 | 25 (16–34)                                  | <0.01          |
| Vegetable protein, g | 29 (23–36)                                 | 17 (14–22)                                  | <0.01          |
| Total fat, g         | 51 (42–69)                                 | 28 (21–36)                                  | <0.01          |
| Animal fat, g        | 27 (18–33)                                 | 14 (9–20)                                   | <0.01          |
| Vegetable fat, g     | 25 (20–33)                                 | 15 (10–21)                                  | <0.01          |
| Carbohydrate, g      | 246 (210–289)                              | 161 (110–192)                               | <0.01          |
| Ash, g               | 19 (15–23)                                 | 11 (9–14)                                   | <0.01          |
| Sodium, g            | 4.1 (3.5–5.2)                              | 2.6 (2.1–3.3)                               | <0.01          |
| Potassium, g         | 2.7 (2.0–3.4)                              | 1.5 (1.0–2.0)                               | <0.01          |
| Calcium, mg          | 622 (446–767)                              | 308 (229–415)                               | <0.01          |
| Magnesium, mg        | 269 (212–326)                              | 150 (110–193)                               | <0.01          |
| Phosphorus, mg       | 1157 (906–1394)                            | 639 (469–776)                               | <0.01          |
| Iron, mg             | 7.9 (6.0–9.8)                              | 4.5 (3.2–6.0)                               | <0.01          |
| Zinc, mg             | 8.1 (6.7–9.8)                              | 4.7 (3.8–6.1)                               | <0.01          |
| Copper, mg           | 1.1 (0.9–1.4)                              | 0.7 (0.6–0.9)                               | <0.01          |
| Manganese, mg        | 3.3 (2.4–4.1)                              | 2.3 (1.5–2.9)                               | <0.01          |
| Vitamin A, µg        | 639 (491–944)                              | 343 (224–517)                               | <0.01          |
| Vitamin D, µg        | 16.8 (11.7–27.0)                           | 8.9 (4.7–14.3)                              | <0.01          |
| α-tocopherol, mg     | 7.5 (6.1–9.5)                              | 4.6 (2.7–5.7)                               | <0.01          |
| Vitamin K, µg        | 239 (149–379)                              | 126 (78–218)                                | <0.01          |
| Vitamin B1, mg       | 0.8 (0.6–1.0)                              | 0.4 (0.3–0.6)                               | <0.01          |
| Vitamin B2, mg       | 1.4 (1.1–1.7)                              | 0.7 (0.6–1.0)                               | <0.01          |
| Niacin, mg           | 18.0 (13.9–24.3)                           | 10.4 (7.1–13.7)                             | <0.01          |
| Vitamin B6, mg       | 1.3 (1.1–1.8)                              | 0.8 (0.6–1.0)                               | <0.01          |
| Vitamin B12, µg      | 11.5 (7.6–16.7)                            | 6.0 (3.4–9.7)                               | <0.01          |
| Folate, µg           | 339 (245–442)                              | 212 (150–272)                               | <0.01          |
| Pantothenic acid, mg | 6.5 (5.6–7.9)                              | 3.7 (2.8–4.6)                               | <0.01          |
| Vitamin C, mg        | 126 (87–166)                               | 85 (50–104)                                 | <0.01          |
| α-carotene, µg       | 358 (152–714)                              | 285 (64–325)                                | <0.01          |
| β-carotene, mg       | 3.2 (1.7–4.9)                              | 1.2 (0.7–2.7)                               | <0.01          |
| Cryptoxanthin, µg    | 297 (121–628)                              | 125 (27–279)                                | <0.01          |
| β-tocopherol, mg     | 0.3 (0.3–0.4)                              | 0.2 (0.1–0.3)                               | <0.01          |
| γ-tocopherol, mg     | 11.7 (9.1–14.9)                            | 7.2 (4.3–10.2)                              | <0.01          |
| σ-tocopherol, mg     | 2.8 (2.1–3.7)                              | 1.7 (1.0–2.2)                               | <0.01          |
| Saturated fat, g     | 14.0 (10.7–18.1)                           | 6.8 (5.4–9.9)                               | <0.01          |

|                            |                  |                |       |
|----------------------------|------------------|----------------|-------|
| Monounsaturated fat, g     | 17.4 (14.9–24.0) | 9.9 (7.2–13.4) | <0.01 |
| Polyunsaturated fat, g     | 12.6 (9.7–15.1)  | 7.5 (4.6–9.9)  | <0.01 |
| Cholesterol, mg            | 412 (260–543)    | 202 (128–279)  | <0.01 |
| Total dietary fiber, g     | 12.2 (8.9–15.3)  | 6.9 (5.2–9.3)  | <0.01 |
| Soluble dietary fiber, g   | 3.0 (2.2–3.9)    | 1.7 (1.3–2.4)  | <0.01 |
| Insoluble dietary fiber, g | 9.0 (6.5–11.0)   | 5.2 (3.7–6.8)  | <0.01 |
| Salt, g                    | 10.2 (8.8–13.3)  | 6.6 (5.4–8.3)  | <0.01 |
| Sucrose, g                 | 9.4 (5.0–15.1)   | 3.9 (1.7–10.1) | <0.01 |

---

Data are median (1st–3rd quartile). Inadequate calorie intake was defined as <60% of the estimated calorie requirement.
